# Supplementary material for: Relationships between arts participation, social cohesion, and well-being: an integrative review of evidence
Source: Frontiers journal article supplement (doi:10.3389/fpubh.2025.1589693), 2025-05-09
Supplement: Table_1.docx [file Table_1.docx]

Search Terms-

(((((art[title/abstract] OR arts[title/abstract] OR artist[title/abstract] OR artists[title/abstract] OR artistic[title/abstract] OR artistry[title/abstract] OR quilt*[title/abstract] OR printmak*[title/abstract] OR "silk screen"[title/abstract] OR "silk screened"[title/abstract] OR "silk screening"[title/abstract] OR acting[title/abstract] OR actor*[title/abstract] OR actress*[title/abstract] OR playwrit*[title/abstract] OR "playwright*"[title/abstract] OR jazz[title/abstract] OR "art-based"[title/abstract] OR "arts-based"[title/abstract] OR "creative effort"[title/abstract] OR "creative efforts"[title/abstract] OR "creative engagement"[title/abstract] OR "creative expression"[title/abstract] OR "creative expressions"[title/abstract] OR "creative process"[title/abstract] OR "creative processes"[title/abstract] OR "creative medicine"[title/abstract] OR "creative practice"[title/abstract] OR "creative therapy"[title/abstract] OR "creative therapies"[title/abstract] OR "creative writing"[title/abstract] OR "group writing"[title/abstract] OR "entertainment education"[title/abstract] OR "expressive activity"[title/abstract] OR "expressive activities"[title/abstract] OR "expressive writing"[title/abstract] OR "graphic novels"[title/abstract] OR "journal writing"[title/abstract] OR "diary writing"[title/abstract] OR "movement therapy"[title/abstract] OR "movement therapies"[title/abstract] OR roleplay*[title/abstract] OR "role play"[title/abstract] OR "role playing"[title/abstract] OR "role-play"[title/abstract] OR "role-playing"[title/abstract] OR "role-plays"[title/abstract] OR animat*[title/abstract] OR artwork*[title/abstract] OR ballet[title/abstract] OR caricature*[title/abstract] OR cartoon*[title/abstract] OR choir*[title/abstract] OR choreography[title/abstract] OR choreographing[title/abstract] OR choreographer*[title/abstract] OR clay[title/abstract] OR collag*[title/abstract] OR comic[title/abstract] OR comics[title/abstract] OR comicbook*[title/abstract] OR danc*[title/abstract] OR drama*[title/abstract] OR psychodrama*[title/abstract] OR drawing*[title/abstract] OR edutainment[title/abstract] OR film[title/abstract] OR films[title/abstract] OR filming[title/abstract] OR fotonovela*[title/abstract] OR photonovella*[title/abstract] OR improvisation*[title/abstract] OR improvization*[title/abstract] OR journaling[title/abstract] OR mandala*[title/abstract] OR mural*[title/abstract] OR museum*[title/abstract] OR music*[title/abstract] OR novela*[title/abstract] OR novella*[title/abstract] OR opera[title/abstract] OR operas[title/abstract] OR operatic[title/abstract] OR paint*[title/abstract] OR photograph*[title/abstract] OR photovoice[title/abstract] OR "photo voice"[title/abstract] OR pictorial[title/abstract] OR plays[title/abstract] OR poet*[title/abstract] OR poem*[title/abstract] OR haiku*[title/abstract] OR portrait*[title/abstract] OR potter*[title/abstract] OR puppet*[title/abstract] OR rap[title/abstract] OR raps[title/abstract] OR rapping[title/abstract] OR sculpt*[title/abstract] OR sing[title/abstract] OR singing[title/abstract] OR sings[title/abstract] OR singer*[title/abstract] OR skit[title/abstract] OR skits[title/abstract] OR song*[title/abstract] OR story[title/abstract] OR stories[title/abstract] OR storyline*[title/abstract] OR storytell*[title/abstract] OR textile*[title/abstract] OR theatr*[title/abstract] OR theater*[title/abstract] OR transmedia[title/abstract] OR watercolor*[title/abstract] OR "water-color"[title/abstract] OR "water-colors"[title/abstract] OR "water color"[title/abstract] OR "water colors"[title/abstract] OR ceramics[title/abstract] OR mosaic*[title/abstract] OR lyrics[title/abstract] OR graffiti[title/abstract] OR "hip hop"[title/abstract] OR aesthetic*[title/abstract] OR esthetic*[title/abstract] OR "spoken word"[title/abstract] OR sketch*[title/abstract] OR coloring[title/abstract] OR video*[title/abstract] OR movie*[title/abstract] OR webcast*[title/abstract] OR "motion picture"[title/abstract] OR "motion pictures"[title/abstract] OR cinema*[title/abstract] OR "electronic game"[title/abstract] OR "electronic games"[title/abstract] OR "electronic gaming"[title/abstract] OR gallery[title/abstract] OR galleries[title/abstract] OR "virtual reality"[title/abstract] OR "virtual realities"[title/abstract] OR "narrative therapy"[title/abstract] OR "narrative therapies"[title/abstract] OR sew[title/abstract] OR sews[title/abstract] OR sewing[title/abstract] OR weave[title/abstract] OR weaves[title/abstract] OR weaving[title/abstract] OR crochet*[title/abstract] OR knit[title/abstract] OR knits[title/abstract] OR knitting[title/abstract] OR spinning[title/abstract] OR needlework*[title/abstract] OR needlepoint*[title/abstract] OR macram*[title/abstract] OR embroider*[title/abstract] OR "rug hooking"[title/abstract] OR tapestr*[title/abstract] OR dyeing[title/abstract] OR "tie-dy*"[title/abstract] OR temari[title/abstract] OR shibori[title/abstract] OR paperfold*[title/abstract] OR "paper folding"[title/abstract] OR origami[title/abstract] OR scrapbook*[title/abstract] OR stamping[title/abstract] OR collage[title/abstract] OR collaging[title/abstract] OR collages[title/abstract] OR decoupage[title/abstract] OR calligraphy[title/abstract] OR papercutting[title/abstract] OR "paper cutting"[title/abstract] OR papercraft*[title/abstract] OR paperart*[title/abstract] OR craft[title/abstract] OR crafts[title/abstract] OR crafting[title/abstract] OR quilling[title/abstract] OR papermaking[title/abstract] OR "paper making"[title/abstract] OR printmaking[title/abstract] OR marbling[title/abstract] OR screenprint*[title/abstract] OR "screen printing"[title/abstract] OR "paper mache"[title/abstract] OR "papier mache"[title/abstract] OR illustration*[title/abstract] OR whittling[title/abstract] OR woodcarving[title/abstract] OR carving[title/abstract] OR "wood work*"[title/abstract] OR coopering[title/abstract] OR cooperage[title/abstract] OR woodburn*[title/abstract] OR pyrography[title/abstract] OR inlay[title/abstract] OR enameling[title/abstract] OR cloisonn*[title/abstract] OR engraving*[title/abstract] OR embossing*[title/abstract] OR etching*[title/abstract] OR "wire work*"[title/abstract] OR "metal work*"[title/abstract] OR metalwork*[title/abstract] OR blacksmith*[title/abstract] OR smithing[title/abstract] OR tinsmith*[title/abstract] OR goldsmith*[title/abstract] OR silversmith*[title/abstract] OR beading[title/abstract] OR handbuilding[title/abstract] OR "hand building"[title/abstract] OR "glass blowing"[title/abstract] OR glassblow*[title/abstract] OR "lamp work*"[title/abstract] OR "stained glass"[title/abstract] OR basketmak*[title/abstract] OR basketry[title/abstract] OR ikebana[title/abstract] OR "flower arrang*"[title/abstract] OR "floral arrang*"[title/abstract] OR "leather work*"[title/abstract] OR leatherwork*[title/abstract] OR batik*[title/abstract] OR lithograph*[title/abstract] OR "jewelry mak*"[title/abstract] OR jewelrymak*[title/abstract] OR stitchery[title/abstract] OR handicraft*[title/abstract] OR sandplay*[title/abstract] OR "sand play*"[title/abstract] OR sandpaint*[title/abstract] OR decorat*[title/abstract])) OR (("Art"[Mesh] OR "Sensory Art Therapies"[Mesh] OR "Art Therapy"[Mesh] OR "Dancing"[Mesh] OR "Gardening"[Mesh] OR "Architecture"[Mesh:NoExp] OR "Interior Design and Furnishings"[Mesh] OR "Photography"[Mesh:NoExp] OR "Printing"[Mesh] OR "Printing, Three-Dimensional"[Mesh] OR "Ceramics"[Mesh:NoExp] OR "Poetry as Topic"[Mesh] OR "Medical Illustration"[Mesh] OR "Video Games"[Mesh] OR "Videotape Recording"[Mesh] OR "Video Recording"[Mesh] OR "Webcasts as Topic"[Mesh] OR "Webcasts"[Publication Type] OR "Instructional Films and Videos"[Publication Type] OR "Motion Pictures"[Mesh] OR "Play and Playthings"[Mesh] OR "Hobbies"[Mesh] OR "Music"[Mesh] OR "Music Therapy"[Mesh] OR "Drama"[Mesh] OR "Psychodrama"[Mesh] OR "Poster"[Publication Type] OR "Television"[Mesh:NoExp] OR "Videodisc Recording"[Mesh] OR "Textiles"[Mesh] OR "Books, Illustrated"[Mesh] OR "Blogging"[Mesh] OR "Color Therapy"[Mesh] OR "Creativity"[Mesh] OR "Fictional Work"[Publication Type] OR "Diary"[Publication Type] OR "Diary as Topic"[Mesh] OR "Graphic Novels as Topic"[Mesh] OR "Graphic Novels"[Publication Type] OR "Portrait"[Publication Type] OR "Portraits as Topic"[Mesh] OR "Drawing"[Publication Type] OR "Narration"[Mesh] OR "Narrative Therapy"[Mesh] OR "Personal Narrative"[Publication Type] OR "Narrative Medicine"[Mesh] OR "Animation"[Publication Type] OR "Caricature"[Publication Type] OR "Pictorial Work"[Publication Type] OR "Caricatures as Topic"[Mesh] OR "Cartoon"[Publication Type] OR "Cartoons as Topic"[Mesh] OR "Architectural Drawing"[Publication Type] OR "Imagination"[Mesh:NoExp] OR "Museums"[Mesh] OR "Paintings"[Mesh] OR "Poetry"[Publication Type] OR "Radio"[Mesh] OR "Play Therapy"[Mesh] OR "Singing"[Mesh] OR "Imagery (Psychotherapy)"[Mesh] OR "Esthetics"[Mesh] OR "Virtual Reality"[Mesh] OR "Virtual Reality Exposure Therapy"[Mesh] OR "Ceramics" [Mesh] OR "Textiles"[Mesh])) NOT (antiretroviral[Title/Abstract] OR "anti retroviral"[Title/Abstract] OR "HAART"[Title/Abstract] OR "assisted reproductive therapy"[Title/Abstract] OR "assisted reproductive therapies"[Title/Abstract] OR "state of the art"[Title/Abstract])) AND (("social cohesi*"[title/abstract] OR "community cohesi*"[title/abstract] OR "cohesive societ*"[title/abstract] OR "cohesive communit*"[title/abstract] OR "community ownership"[title/abstract] OR "civic engagement"[title/abstract] OR belong[title/abstract] OR belongs[title/abstract] OR belonging[title/abstract] OR "social participation"[title/abstract] OR "place attachment"[title/abstract] OR "social capital"[title/abstract] OR "common good"[title/abstract] OR "community building"[title/abstract] OR "building communit*"[title/abstract] OR "community development"[title/abstract] OR "community rehabilitation"[title/abstract] OR connectedness[title/abstract] OR "collective voice"[title/abstract] OR "community resilience"[title/abstract] OR "civic capacity"[title/abstract] OR "community capacity"[title/abstract] OR "social inclusion"[title/abstract] OR "community inclusion"[title/abstract] OR "community integrat*"[title/abstract] OR "place making"[title/abstract] OR "community participation"[title/abstract] OR "cultural participation"[title/abstract] OR "community engagement"[title/abstract] OR "social engagement"[title/abstract] OR "community connection*"[title/abstract] OR "community network*"[title/abstract] OR "sense of community"[title/abstract] OR "social tolerance"[title/abstract] OR altruism[title/abstract] OR altruistic[title/abstract] OR "civic integrat*"[title/abstract] OR "social integrat*"[title/abstract] OR "social reintegra*"[title/abstract] OR "political trust"[title/abstract] OR "Social activism"[title/abstract] OR "community activism"[title/abstract] OR "community quality of life"[title/abstract] OR "social support"[title/abstract] OR "community support"[title/abstract] OR "Social isolation"[title/abstract] OR "socially isolated"[title/abstract] OR "social discrimination"[title/abstract] OR "Social exclusion"[title/abstract] OR "Social stigma*"[title/abstract] OR "social relations"[title/abstract] OR voluntarism[title/abstract] OR "political participation"[title/abstract] OR "community solidarity"[title/abstract] OR "social solidarity"[title/abstract] OR "sociocultural participation"[title/abstract] OR "sociocultural cohesi*"[title/abstract] OR "Sociocultural engagement"[title/abstract] OR "sociocultural inclusion"[title/abstract] OR "community conversation*"[title/abstract] OR "community vitality"[title/abstract] OR "social tie"[title/abstract] OR "Social ties"[title/abstract] OR "community tie"[title/abstract] OR "community ties"[title/abstract] OR "social trust"[title/abstract] OR "community trust"[title/abstract] OR "institutional trust"[title/abstract] OR "density of social relation*"[title/abstract] OR "community function*"[title/abstract] OR "social identity"[title/abstract] OR "community identity"[title/abstract] OR "community bond*"[title/abstract] OR "Social bond*"[title/abstract] OR prosocial[title/abstract] OR "social connectivity"[title/abstract] OR "community connectivity"[title/abstract]))) AND ((local[Title/Abstract] OR localit*[Title/Abstract] OR neighborhood*[Title/Abstract] OR neighbourhood*[Title/Abstract] OR statewide[Title/Abstract] OR communit*[Title/Abstract] OR "public health"[Title/Abstract] OR "CBPR"[Title/Abstract] OR city[Title/Abstract] OR cities[Title/Abstract] OR municipal*[Title/Abstract] OR county[Title/Abstract] OR counties[Title/Abstract] OR town[Title/Abstract] OR towns[Title/Abstract] OR village*[Title/Abstract] OR suburb*[Title/Abstract] OR region*[Title/Abstract] OR parish*[Title/Abstract] OR diocese*[Title/Abstract] OR district*[Title/Abstract] OR barrio*[Title/Abstract]) OR ("Cities"[Mesh] OR "Suburban Population"[Mesh] OR "Urban Population"[Mesh] OR "Poverty Areas"[Mesh] OR "Local Government"[Mesh] OR "Suburban Health Services"[Mesh] OR "Rural Health Services"[Mesh]))
